# Supplementary material
Source: MDPI journal article supplement (https://www.mdpi.com/2072-4292/15/1/71)
Supplement: s1 [file s1]

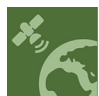**Table S1.** The relationship between GPP and NIRv.

| Vegetation Type | Linear Function                 | R <sup>2</sup> |
|-----------------|---------------------------------|----------------|
| CRO-C3          | $GPP = 55.38 \cdot NIRv - 1.97$ | 0.65           |
| CRO-C4          | $GPP = 99.96 \cdot NIRv - 3.39$ | 0.79           |
| DBF             | $GPP = 64.07 \cdot NIRv - 2.20$ | 0.67           |
| EBF             | $GPP = 44.50 \cdot NIRv + 2.60$ | 0.45           |
| ENF             | $GPP = 64.51 \cdot NIRv - 1.41$ | 0.65           |
| MF              | $GPP = 59.49 \cdot NIRv - 2.93$ | 0.70           |
| SAV             | $GPP = 69.99 \cdot NIRv - 1.52$ | 0.79           |
| SHR             | $GPP = 36.18 \cdot NIRv - 0.87$ | 0.70           |
| GRA             | $GPP = 68.13 \cdot NIRv - 1.62$ | 0.74           |
| WET             | $GPP = 57.66 \cdot NIRv - 1.31$ | 0.67           |

Note: CRO, DBF, EBF, ENF, MF, SAV SHR, GRA and WET is crop, deciduous broadleaf forest, evergreen broadleaf forest, evergreen needle forest, mixed forest, savanna, shrub, grass and wet land.
